# Supplementary material
Source: publisher site journal article supplement (https://www.dovepress.com/article/386269)

**Supplementary Material**

**Table S1** Associations between serum LDH with all-cause mortality in various subgroups among patients with COPD

|  |  | **Serum LDH levels** | | | | | ***P* interaction** |
| --- | --- | --- | --- | --- | --- | --- | --- |
|  | **Deaths/Total** | **59-111(U/L)** | **112-123(U/L)** | **124-135(U/L)** | **136-150(U/L)** | **151-344(U/L)** |
|  | **n** | **T1 (n = 253)** | **T2 (n = 267)** | **T3 (n = 278)** | **T4 (n = 266)** | **T5 (n = 256)** |
| **Age, years** |  |  |  |  |  |  | 0.70 |
| <65 | 84/814 | 1.16 (0.55~2.43) | 1.66 (0.84~3.29) | Ref. | 1.34 (0.65~2.73) | 1.09 (0.52~2.30) |  |
| ≥65 | 168/506 | 1.18 (0.66~2.12) | 1.59 (0.91~2.76) | Ref. | 1.59 (0.95~2.66) | 1.92 (1.14~3.24) |  |
| **Sex** |  |  |  |  |  |  | 0.27 |
| Male | 170/823 | 1.09 (0.63~1.89) | 1.51 (0.91~2.50) | Ref. | 1.33 (0.81~2.20) | 1.91 (1.17~3.13) |  |
| Female | 82/497 | 1.48 (0.65~3.41) | 1.85 (0.80~4.31) | Ref. | 2.14 (1.01~4.55) | 1.37 (0.62~3.03) |  |
| **Race-ethnicity** |  |  |  |  |  |  | 0.72 |
| Non-Hispanic White | 174/836 | 1.01 (0.58~1.7) | 1.46 (0.89~2.39) | Ref. | 1.31 (0.81~2.12) | 1.61 (0.98~2.66) |  |
| Other | 78/484 | 1.82 (0.75~4.44) | 1.82 (0.77~4.29) | Ref. | 1.97 (0.89~4.35) | 1.63 (0.73~3.62) |  |
| **BMI, kg/m2** |  |  |  |  |  |  | 0.85 |
| <25 | 101/467 | 1.27 (0.60~2.72) | 1.76 (0.90~3.43) | Ref. | 1.67 (0.90~3.07) | 1.41 (0.70~2.82) |  |
| 25-30 | 71/454 | 1.09 (0.42~2.78) | 1.71 (0.74~3.94) | Ref. | 1.68 (0.70~4.04) | 1.60 (0.67~3.84) |  |
| ≥30 | 80/399 | 1.06 (0.46~2.41) | 1.01 (0.44~2.31) | Ref. | 1.04 (0.48~2.25) | 1.58 (0.76~3.28) |  |
| **Smoking Status** |  |  |  |  |  |  | 0.64 |
| Never Smoker | 51/389 | 0.89 (0.26~3.08) | 1.87 (0.68~5.12) | Ref. | 0.79 (0.28~2.23) | 1.28 (0.49~3.30) |  |
| Former Smoker | 104/463 | 1.18 (0.57~2.44) | 1.08 (0.53~2.22) | Ref. | 1.55 (0.81~2.98) | 1.67 (0.87~3.19) |  |
| Current Smoker | 97/468 | 1.72 (0.83~3.55) | 2.27 (1.17~4.42) | Ref. | 2.45 (1.24~4.83) | 1.79 (0.86~3.71) |  |
| **Hypertension** |  |  |  |  |  |  | 0.38 |
| Yes | 171/689 | 1.12 (0.64~1.96) | 1.31 (0.76~2.25) | Ref. | 1.14 (0.69~1.91) | 1.43 (0.86~2.36) |  |
| No | 81/631 | 1.25 (0.55~2.84) | 2.7 (1.28~5.69) | Ref. | 2.90(1.43~5.88) | 1.59 (0.71~3.59) |  |
| **Diabetes** |  |  |  |  |  |  | 0.24 |
| Yes | 86/280 | 1.37 (0.5~3.77) | 1.44 (0.52~4.01) | Ref. | 1.14 (0.44~2.96) | 1.31 (0.50~3.45) |  |
| No | 166/1040 | 1.10(0.64~1.88) | 1.52 (0.93~2.47) | Ref. | 1.67 (1.05~2.64) | 1.62 (1.01~2.61) |  |
| **CVD** |  |  |  |  |  |  | 0.82 |
| Yes | 77/212 | 1.79 (0.76~4.19) | 1.79 (0.72~4.41) | Ref. | 1.96 (0.82~4.66) | 1.84 (0.77~4.44) |  |
| No | 175/1108 | 0.86 (0.48~1.54) | 1.69 (1.03~2.77) | Ref. | 1.53 (0.95~2.45) | 1.50 (0.92~2.44) |  |
| **GOLD stage** |  |  |  |  |  |  | 0.03 |
| GOLD stage(Ⅰ) | 97/715 | 0.71 (0.25~2.04) | 2.17 (1.04~4.51) | Ref. | 2.50(1.32~4.73) | 1.91 (0.97~3.76) |  |
| GOLD stage(Ⅱ-Ⅳ) | 155/605 | 1.40 (0.82~2.38) | 1.52 (0.88~2.63) | Ref. | 1.14 (0.66~1.98) | 1.50(0.87~2.58) |  |
| **Age≥40+Former or Current Smoker** |  |  |  |  |  |  | 0.44 |
| Yes | 193/820 | 1.06 (0.35~3.22) | 2.05 (0.8~5.31) | Ref. | 0.98 (0.36~2.62) | 1.79 (0.71~4.49) |  |
| No | 59/500 | 1.24 (0.75~2.05) | 1.48 (0.91~2.4) | Ref. | 1.69 (1.08~2.66) | 1.58 (0.97~2.55) |  |

**Abbreviations:** CVD, cardiovascular disease

**Table S2** Baseline characteristics of the study participants

| **Variables** |  | **Serum LDH levels** | | | | | ***P-value*** |
| --- | --- | --- | --- | --- | --- | --- | --- |
| **Total** | **58-114(U/L)** | **115-127(U/L)** | **128-140(U/L)** | **141-154(U/L)** | **155-476(U/L)** |
| **(n = 969)** | **T1 (n =190)** | **T2 (n =194)** | **T3 (n = 193)** | **T4 (n = 196)** | **T5 (n =196)** |
| Age, years | 61.3 ± 13.2 | 57.8 ± 13.8 | 60.6 ± 13.2 | 61.4 ± 13.0 | 63.4 ± 12.7 | 63.3 ± 12.8 | < 0.001 |
| Sex,n (%) |  |  |  |  |  |  | 0.023 |
| Male | 599 (61.8) | 127 (66.8) | 126 (64.9) | 126 (65.3) | 117 (59.7) | 103 (52.6) |  |
| Female | 370 (38.2) | 63 (33.2) | 68 (35.1) | 67 (34.7) | 79 (40.3) | 93 (47.4) |  |
| Race-ethnicity, n (%) |  |  |  |  |  |  | 0.067 |
| Mexican American | 44 ( 4.5) | 13 (6.8) | 11 (5.7) | 10 (5.2) | 4 (2) | 6 (3.1) |  |
| Other Hispanic | 57 ( 5.9) | 15 (7.9) | 14 (7.2) | 8 (4.1) | 12 (6.1) | 8 (4.1) |  |
| Non-Hispanic White | 649 (67.0) | 125 (65.8) | 136 (70.1) | 135 (69.9) | 130 (66.3) | 123 (62.8) |  |
| Non-Hispanic Black | 170 (17.5) | 29 (15.3) | 23 (11.9) | 28 (14.5) | 41 (20.9) | 49 (25) |  |
| Other Race-Including Multi Racial | 49 ( 5.1) | 8 (4.2) | 10 (5.2) | 12 (6.2) | 9 (4.6) | 10 (5.1) |  |
| Education Level,n (%) |  |  |  |  |  |  | 0.491 |
| Low (≤9 years) | 122 (12.6) | 17 (8.9) | 24 (12.4) | 19 (9.8) | 30 (15.3) | 32 (16.3) |  |
| Medium (9–13 years) | 413 (42.6) | 84 (44.2) | 83 (42.8) | 85 (44) | 81 (41.3) | 80 (40.8) |  |
| High (≥13 years) | 434 (44.8) | 89 (46.8) | 87 (44.8) | 89 (46.1) | 85 (43.4) | 84 (42.9) |  |
| Poverty Income Ratio,(%) Mean ± SD | 2.4 ± 1.6 | 2.3 ± 1.6 | 2.5 ± 1.7 | 2.3 ± 1.6 | 2.6 ± 1.6 | 2.2 ± 1.6 | 0.189 |
| BMI, kg/m2, n(%) |  |  |  |  |  |  | 0.387 |
| Under weight(<18.5) | 24 ( 2.5) | 5 (2.7) | 3 (1.6) | 6 (3.1) | 2 (1) | 8 (4.2) |  |
| Normal weight(18.5-24.9) | 260 (27.2) | 45 (24.1) | 50 (26.3) | 53 (27.5) | 60 (30.9) | 52 (27.1) |  |
| Over wight(25-29.9) | 327 (34.2) | 72 (38.5) | 74 (38.9) | 65 (33.7) | 62 (32) | 54 (28.1) |  |
| Obese(>30) | 345 (36.1) | 65 (34.8) | 63 (33.2) | 69 (35.8) | 70 (36.1) | 78 (40.6) |  |
| Mean ± SD | 29.0 ± 7.1 | 28.7 ± 6.2 | 28.7 ± 6.1 | 28.6 ± 6.6 | 29.0 ± 7.2 | 29.9 ± 9.0 | 0.402 |
| Smoking Status, n (%) |  |  |  |  |  |  | 0.104 |
| Never Smoker | 168 (17.3) | 28 (14.7) | 37 (19.1) | 31 (16.1) | 40 (20.4) | 32 (16.3) |  |
| Former Smoker | 438 (45.2) | 73 (38.4) | 85 (43.8) | 88 (45.6) | 91 (46.4) | 101 (51.5) |  |
| Current Smoker | 363 (37.5) | 89 (46.8) | 72 (37.1) | 74 (38.3) | 65 (33.2) | 63 (32.1) |  |
| **Comorbidity** |  |  |  |  |  |  |  |
| CVD, n (%) | 262 (27.0) | 50 (26.3) | 50 (25.8) | 44 (22.8) | 48 (24.5) | 70 (35.7) | 0.039 |
| Hypertension, n (%) | 580 (59.9) | 95 (50) | 104 (53.6) | 117 (60.6) | 128 (65.3) | 136 (69.4) | < 0.001 |
| Diabetes, n (%) | 276 (28.5) | 52 (27.4) | 44 (22.7) | 55 (28.5) | 63 (32.1) | 62 (31.6) | 0.234 |
| Stroke, n (%) | 89 ( 9.2) | 17 (8.9) | 19 (9.8) | 11 (5.7) | 19 (9.7) | 23 (11.7) | 0.343 |
| Cancer, n (%) | 164 (16.9) | 28 (14.7) | 37 (19.1) | 36 (18.7) | 28 (14.3) | 35 (17.9) | 0.594 |
| **Mortality, n (%)** | 326 (33.6) | 59 (31.1) | 54 (27.8) | 51 (26.4) | 73 (37.2) | 89 (45.4) | < 0.001 |
| **Pulmonary function test** |  |  |  |  |  |  |  |
| FVC, (ml) | 3650.0  (2886.0, 4612.0) | 3910.0 (3074.0, 4751.0) | 3877.0 (3094.0, 4891.0) | 3605.0 (3059.0, 4587.0) | 3528.0 (2768.0, 4423.0) | 3074.0 (2535.0, 4201.0) | < 0.001 |
| Median (IQR) |
| FEV1, (ml) | 2282.0  (1846.0, 2992.0) | 2428.0 (1900.0, 3044.0) | 2321.0 (1902.0, 3076.0) | 2330.0 (1874.0, 3066.0) | 2210.0 (1848.0, 2938.0) | 2116.0 (1628.0, 2658.0) | 0.023 |
| Median (IQR) |
| FEV1% predicted ,(%) | 0.80 ± 0.19 | 0.77 ± 0.19 | 0.79 ± 0.18 | 0.80 ± 0.19 | 0.83 ± 0.20 | 0.79 ± 0.20 | 0.132 |
| Mean ± SD |
| **GOLD stage, n (%)** |  |  |  |  |  |  | 0.281 |
| GOLD stage(Ⅰ) | 331 (34.2) | 62 (32.6) | 67 (34.5) | 73 (37.8) | 74 (37.8) | 55 (28.1) |  |
| GOLD stage(Ⅱ) | 284 (29.3) | 69 (36.3) | 72 (37.1) | 50 (25.9) | 46 (23.5) | 47 (24) |  |
| GOLD stage(III- IV) | 44 ( 4.5) | 11 (5.8) | 8 (4.1) | 9 (4.7) | 7 (3.6) | 9 (4.6) |  |
| Missing | 310 (32.0) | 48 (25.3) | 47 (24.2) | 61 (31.6) | 69 (35.2) | 85 (43.4) |  |
| **Laboratory** |  |  |  |  |  |  |  |
| WBC,(×109/L) | 7.6 ± 2.5 | 7.8 ± 1.9 | 7.6 ± 2.1 | 7.7 ± 2.1 | 7.3 ± 2.3 | 7.7 ± 3.6 | 0.29 |
| Mean ± SD |
| Neutrophil,(×109/L) | 4.7 ± 1.8 | 4.7 ± 1.6 | 4.7 ± 1.7 | 4.7 ± 1.7 | 4.6 ± 2.0 | 4.6 ± 2.1 | 0.862 |
| Mean ± SD |
| Haemoglobin,(g/dL) | 14.3 ± 1.6 | 14.5 ± 1.5 | 14.3 ± 1.6 | 14.6 ± 1.5 | 14.2 ± 1.7 | 14.0 ± 1.7 | 0.002 |
| Mean ± SD |
| MCV, (fL) | 90.6 ± 6.0 | 90.3 ± 5.2 | 90.0 ± 6.8 | 90.7 ± 5.0 | 91.2 ± 5.0 | 90.8 ± 7.6 | 0.3 |
| Mean ± SD |
| ALT,(U/L) | 20.0 (16.0, 27.0) | 18.0 (15.0, 23.0) | 19.0 (15.0, 25.0) | 21.0 (17.0, 28.0) | 21.0 (17.0, 27.0) | 23.0 (18.8, 31.0) | < 0.001 |
| Median (IQR) |
| ALB,(g/L) | 41.7 ± 3.3 | 41.8 ± 3.2 | 41.7 ± 3.6 | 42.4 ± 3.3 | 41.6 ± 3.1 | 41.2 ± 3.4 | 0.01 |
| Mean ± SD |
| LDH, (U/L) | 137.0 ± 31.4 | 102.8 ± 9.8 | 121.2 ± 3.5 | 133.7 ± 3.6 | 146.5 ± 4.0 | 179.6 ± 37.8 | < 0.001 |
| Mean±SD |

**Abbreviations:** FVC, forced vital capacity; FEV1, forced expiratory volume in the first 1 second; LDH, serum lactate dehydrogenase; BMI, body mass index; CVD, cardiovascular disease; FEV1% predicted, FEV in 1 second percent of predicted ratio of FEV1 to FVC; MCV, mean corpuscular volume; ALT, alanine aminotransferase; ALB, albumin

**Table S3** Multivariate Cox regression for LDH on all-cause mortality of COPD

| **Variable** | **Total** | **Nonadjusted Model** | ***p* Value** | **Adjusted Model** | ***p* Value** |
| --- | --- | --- | --- | --- | --- |
| **n** | **HR (95% CI)** | **HR (95% CI)** |
| Binary variable |  |  |  |  |  |
| T1 | 190 | 1.22 (0.84~1.78) | 0.295 | 1.57 (0.89~2.77) | 0.119 |
| LDH 58-114(U/L) |
| T2 | 194 | 1.05 (0.72~1.54) | 0.804 | 1.12 (0.62~2.04) | 0.699 |
| LDH 115-127(U/L) |
| T3 | 193 | Ref. |  | Ref. |  |
| LDH 128-140(U/L) |
| T4 | 196 | 1.52 (1.06~2.17) | 0.022 | 1.78 (1.01~3.11) | 0.045 |
| LDH 141-154(U/L) |
| T5 | 196 | 2.08 (1.48~2.94) | <0.001 | 2.00 (1.08~3.69) | 0.027 |
| LDH 155-476(U/L) |
| *P* for trend |  |  | <0.001 |  | 0.233 |

**Notes:** Adjust for Age+Sex+Race+Education+Poverty Income Ratio+BMI+Smoking Status +Diabetes+Hypertension +Stroke+Cancer+ALT+ALB+Neutrophi+Haemoglobin+MCV+FEV1% predicted

**Table S4** Baseline characteristics of the study participants

|  |  | **Serum LDH levels** | |  |
| --- | --- | --- | --- | --- |
| **Variables** | **Total (n = 1320)** | **LDH<110U/L**  **(n = 217)** | **LDH≥110U/L**  **(n = 1103)** | **P-value** |
| Age, Mean ± SD | 57.9 ± 14.2 | 52.5 ± 15.4 | 58.9 ± 13.7 | < 0.001 |
| Sex,n (%) |  |  |  | 0.204 |
| Male | 823 (62.3) | 127 (58.5) | 696 (63.1) |  |
| Female | 497 (37.7) | 90 (41.5) | 407 (36.9) |  |
| Race-ethnicity, n (%) |  |  |  | 0.468 |
| Mexican American | 90 ( 6.8) | 15 (6.9) | 75 (6.8) |  |
| Other Hispanic | 90 ( 6.8) | 10 (4.6) | 80 (7.3) |  |
| Non-Hispanic White | 836 (63.3) | 147 (67.7) | 689 (62.5) |  |
| Non-Hispanic Black | 240 (18.2) | 37 (17.1) | 203 (18.4) |  |
| Other Race-Including Multi Racial | 64 ( 4.8) | 8 (3.7) | 56 (5.1) |  |
| BMI_kg.m2, Mean ± SD | 27.8 ± 6.1 | 27.0 ± 6.3 | 28.0 ± 6.0 | 0.034 |
| Education Level,n (%) |  |  |  | 0.006 |
| Low (≤9 years) | 128 ( 9.7) | 10 (4.6) | 118 (10.7) |  |
| Medium (9–13 years) | 576 (43.6) | 110 (50.7) | 466 (42.2) |  |
| High (≥13 years) | 616 (46.7) | 97 (44.7) | 519 (47.1) |  |
| FEV1% predicted ,(%) | 0.8 ± 0.2 | 0.8 ± 0.2 | 0.8 ± 0.2 | 0.005 |
| Hypertension, n (%) |  |  |  | < 0.001 |
| No | 631 (47.8) | 131 (60.4) | 500 (45.3) |  |
| Yes | 689 (52.2) | 86 (39.6) | 603 (54.7) |  |
| CVD, n (%) |  |  |  | 0.112 |
| No | 1108 (83.9) | 190 (87.6) | 918 (83.2) |  |
| Yes | 212 (16.1) | 27 (12.4) | 185 (16.8) |  |
| Smoking Status, n (%) |  |  |  | 0.005 |
| Former Smoker | 463 (35.1) | 64 (29.5) | 399 (36.2) |  |
| Never Smoker | 389 (29.5) | 55 (25.3) | 334 (30.3) |  |
| Current Smoker | 468 (35.5) | 98 (45.2) | 370 (33.5) |  |
| Diabetes, n (%) |  |  |  | 0.712 |
| No | 1040 (78.8) | 173 (79.7) | 867 (78.6) |  |
| Yes | 280 (21.2) | 44 (20.3) | 236 (21.4) |  |
| Physical Activity,( min/wk)* | 600.0 (210.0, 1545.0) | 430.0 (210.0, 1470.0) | 600.0 (225.0, 1560.0) | 0.093 |
| Missing,n (%) | 351(26.5%) | 58(26.7%) | 293(26.5%) |  |

**Abbreviations:** FVC, forced vital capacity; FEV1, forced expiratory volume in the first 1 second; BMI, body mass index; CVD, cardiovascular disease; FEV1% predicted, FEV in 1 second percent of predicted ratio of FEV1 to FVC

**Note**: *There has some missing data

**Table S5** Associations between serum LDH and PA in subgroups among patients with COPD

| **Variable** | **Total**  **n** | **Nonadjusted Model**  **β (95% CI)** | **p Value** | **Adjusted Model**  **β (95% CI)** | **p Value** | **p interaction** |
| --- | --- | --- | --- | --- | --- | --- |
| Subgroup |  |  |  |  |  | 0.038 |
| LDH<110U/L | 217 | 30.03 (3.56~56.49) | 0.028 | 29.21 (2.74~55.68) | 0.032 |  |
| LDH≥110U/L | 1103 | -4.15 (-9.71~1.4) | 0.143 | -1.54 (-7.02~3.94) | 0.581 |  |

**Notes:** adjusted for age + sex + race + education + BMI + smoking status + diabetes +hypertension + CVD + FEV1% predicted

Figure S1 Association between serum LDH and all-cause mortality

Adjusted for Age+Sex+Race+Education+Poverty Income Ratio+ BMI+Smoking Status+Diabetes+Hypertension+CVD+Stroke+Cancer+ALT+ALB+Neutrophi+Haemoglobin+MCV+FEV1% predicted. Abbreviations:BMI,body mass index; CVD,cardiovascular diseases;MCV,mean corpuscular volune;FEV1%predicted;Forced expiratory volume in 1 second percent of predicted; ALT,alanine aminotransferase;ALB,albumin.

The black line and dotted lines represent the estimated values and their corresponding 95% confidence intervals, respectively


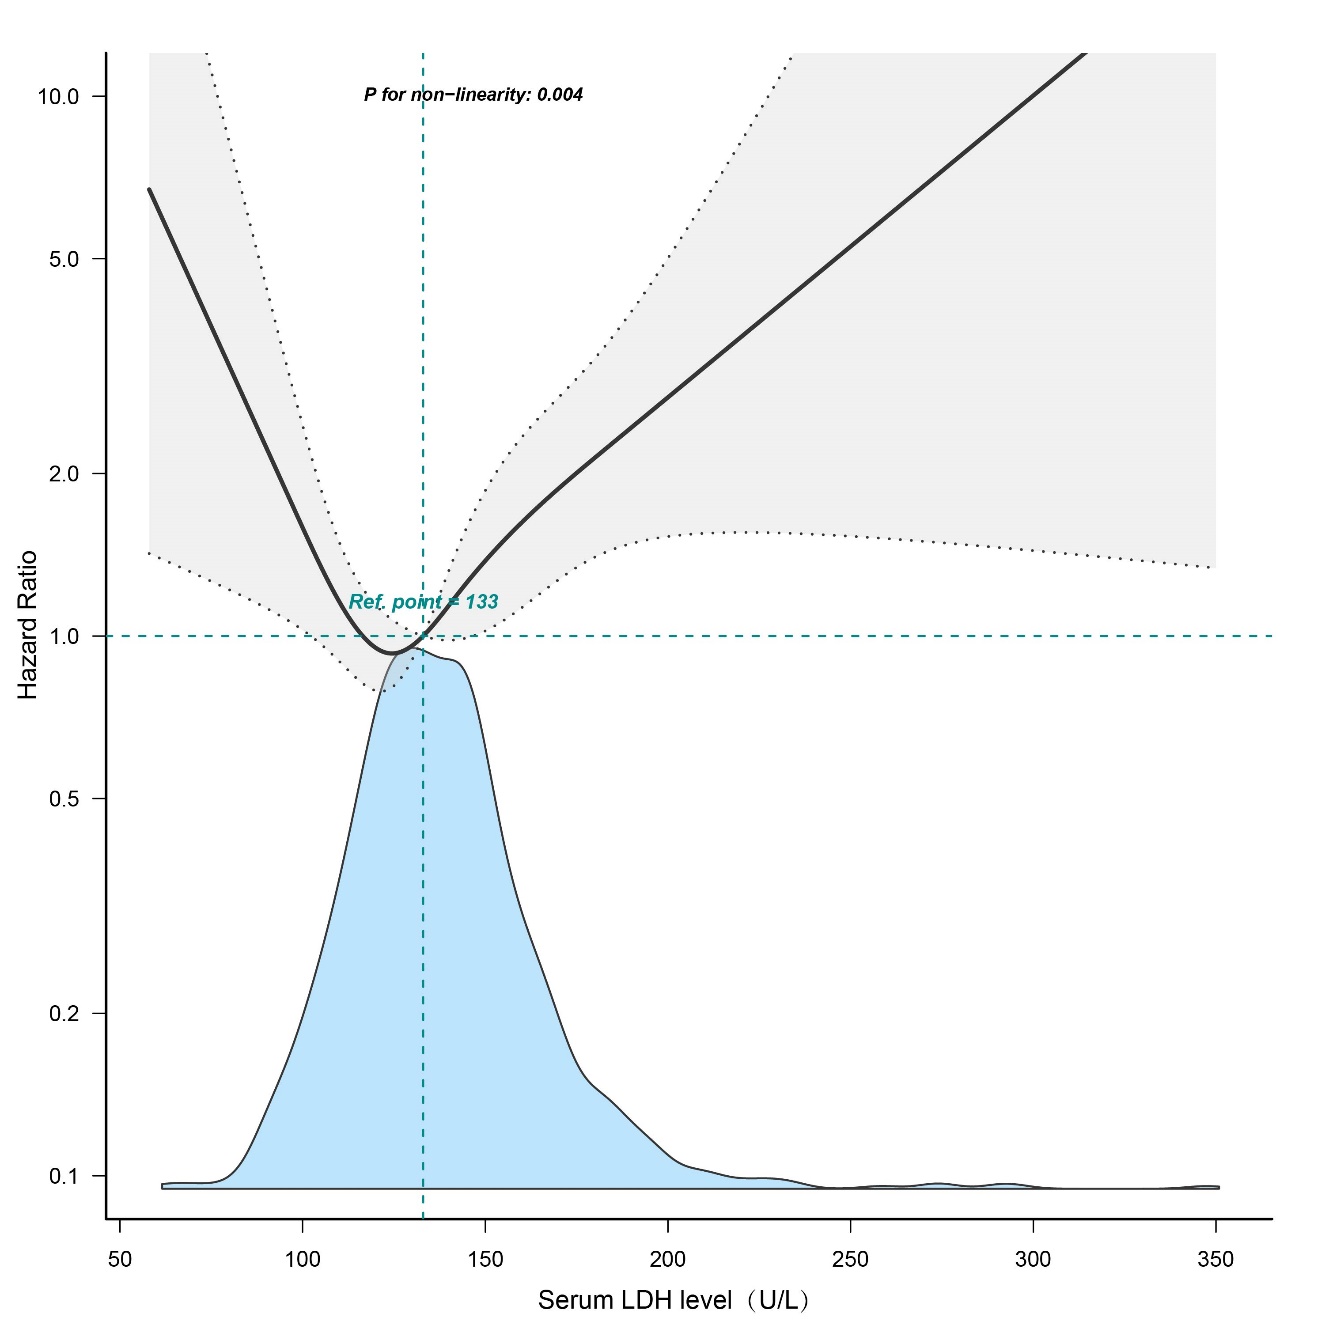

Supplement: Supplementary file 1 [file get_supplementary_file.php]
